# Supplementary material for: Association of inclusion body myositis with T cell large granular lymphocytic leukaemia
Source: Oxford University Press journal article supplement (doi:10.1093/brain/aww024), 2016-02-26
Supplement: aww024_Supplementary_Data.zip [file aww024_Supplementary_Data.zip]

Archive with 5 entries (5 files):
- R1_Submission_proof.pdf
- Supplementary_Figure_4.pdf
- Supplementary_Figure_1.pdf
- Supplementary_Figure_3.pdf
- Supplementary_Figure_2.pdf
