# Supplementary figures and images for: Association of inclusion body myositis with T cell large granular lymphocytic leukaemia
Source: Oxford University Press journal article supplement (doi:10.1093/brain/aww024), 2016-02-26

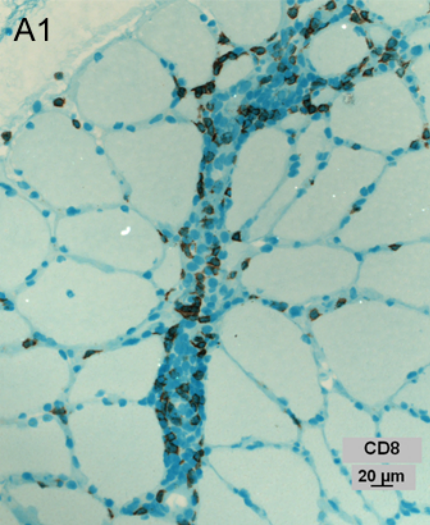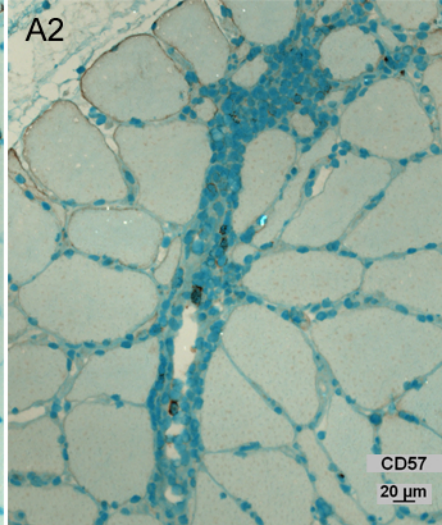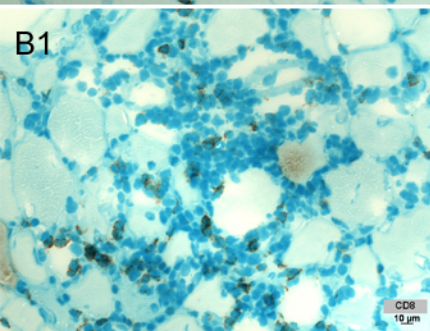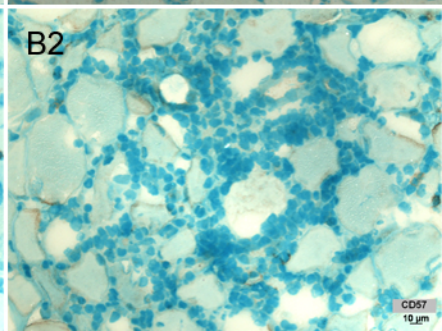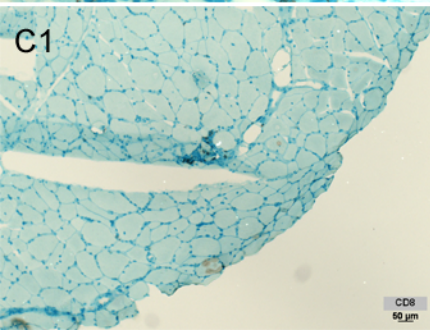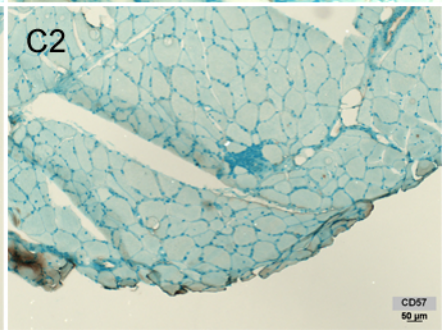

Supplement: aww024_Supplementary_Data.zip [file aww024_Supplementary_Data.zip › Supplementary_Figure_4.pdf]

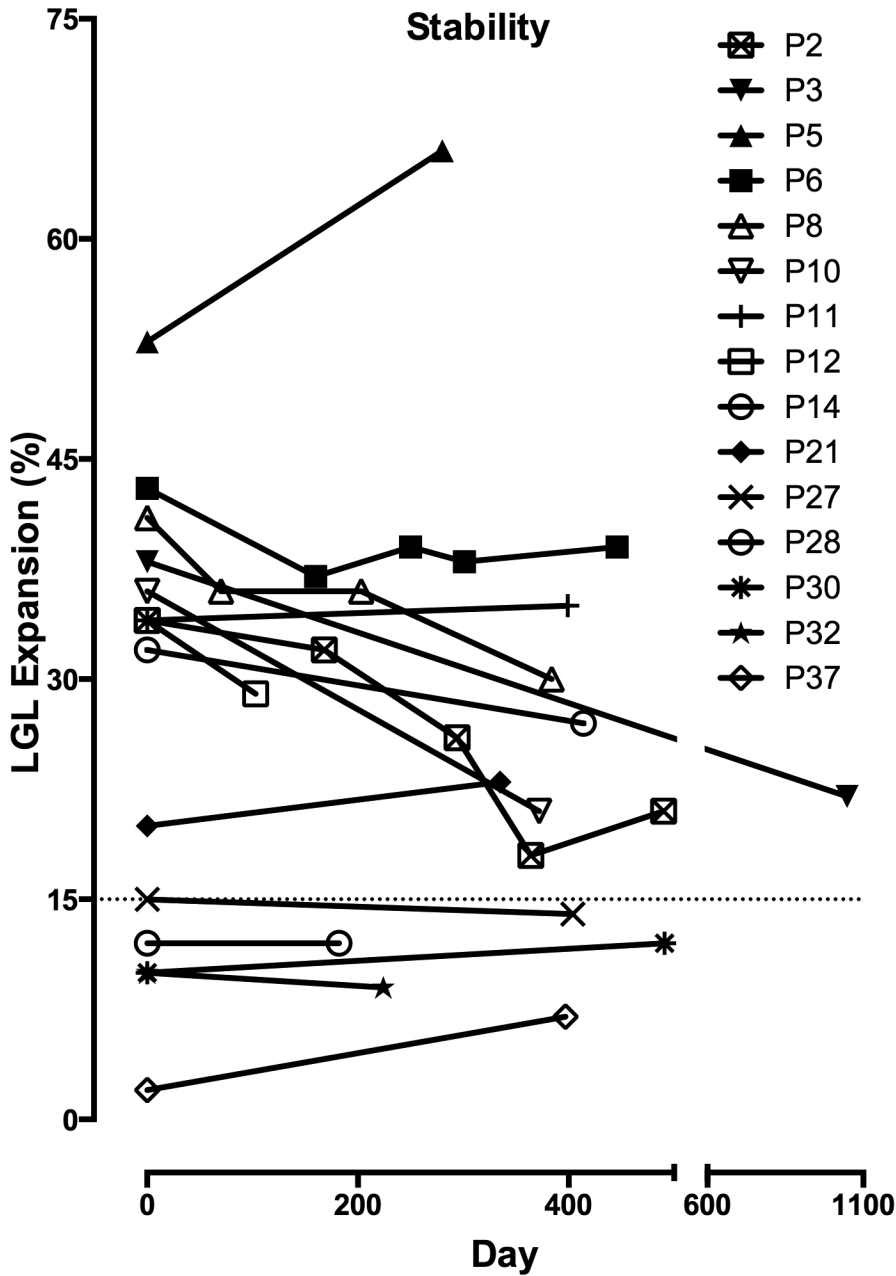

Supplement: aww024_Supplementary_Data.zip [file aww024_Supplementary_Data.zip › Supplementary_Figure_1.pdf]

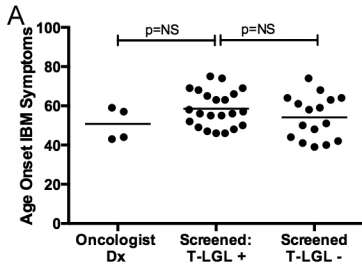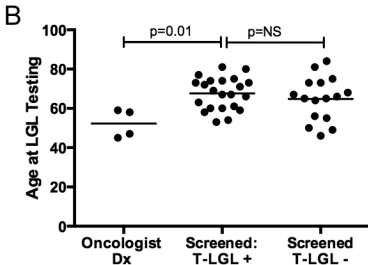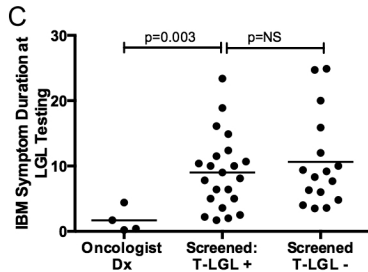

Supplement: aww024_Supplementary_Data.zip [file aww024_Supplementary_Data.zip › Supplementary_Figure_3.pdf]

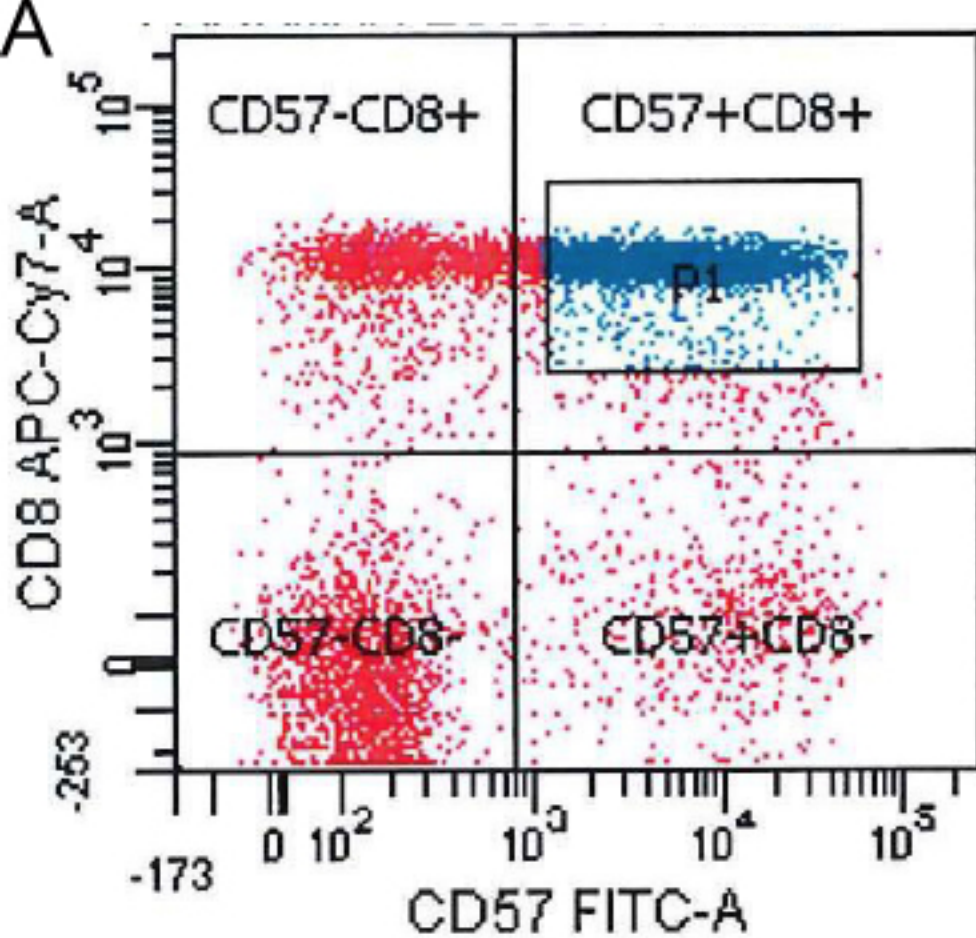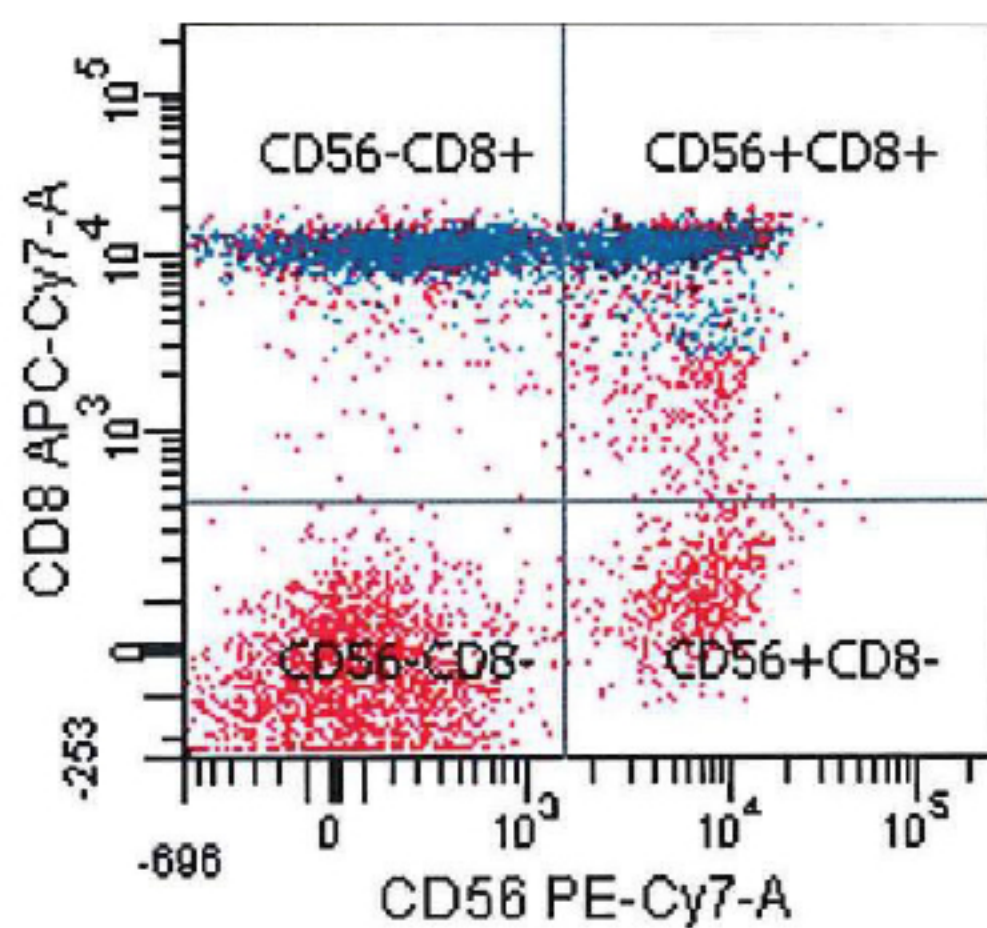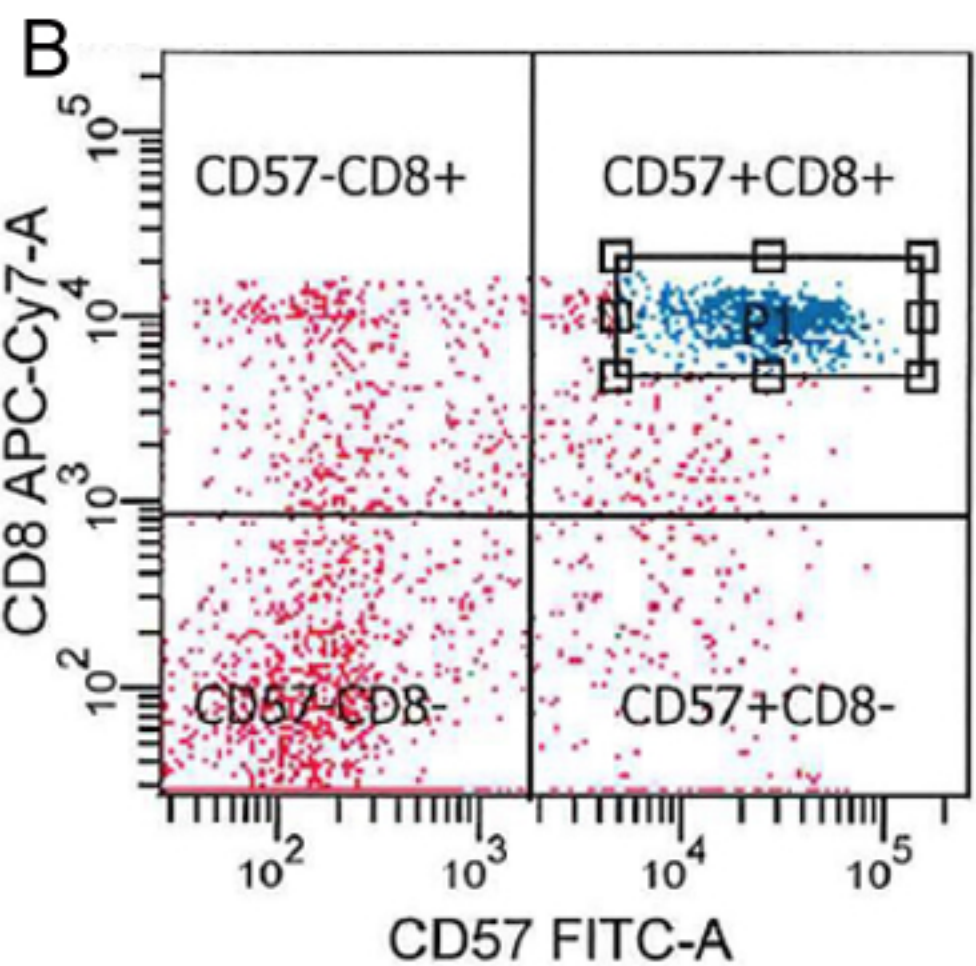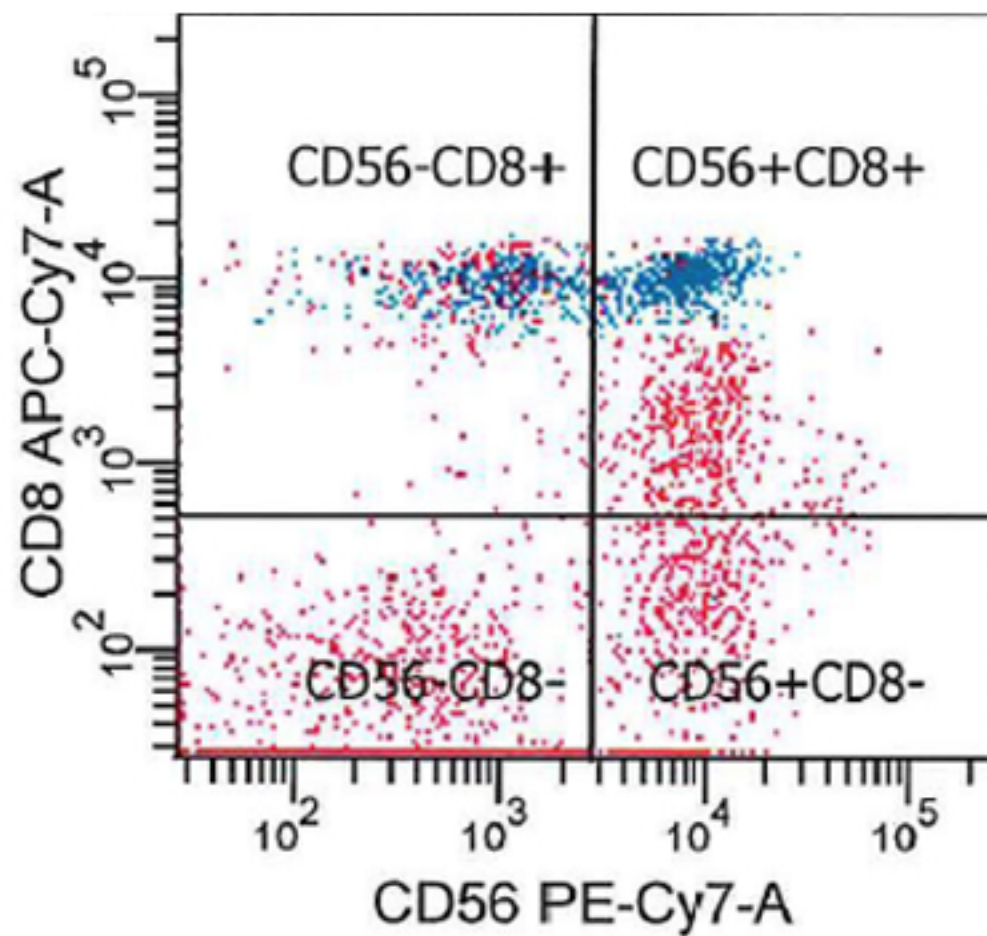

Supplement: aww024_Supplementary_Data.zip [file aww024_Supplementary_Data.zip › Supplementary_Figure_2.pdf]
